# Supplementary material for: Synthesis of nitrogen doped mesoporous carbons for carbon dioxide capture
Source: Royal Society of Chemistry journal article supplement (doi:10.1039/c5ra05684e), 2015-01-01
Supplement: c5ra05684e1.pdf [file c5ra05684e1.pdf]

## Electronic Supplementary Information

### Synthesis of Nitrogen Doped Mesoporous Carbons for Carbon Dioxide Capture

Chitракshi Goel, Haripada Bhunia, and Pramod K. Bajpai\*

chitракshigoel@yahoo.co.in, hbhuniah@thapar.edu, pkbajpai@thapar.edu

Department of Chemical Engineering, Thapar University, Patiala-147004, Punjab, India

\*Correspondence to: Pramod K. Bajpai

Email address: pkbajpai@thapar.edu

Phone: +91-175-2393438; fax: +91-175-2393005

#### Content:

**Fig. S1** Schematic diagram of the adsorption-desorption setup.

**Fig. S2** TEM images (a) & (b), SEM images (c) & (d) of MF-700.

**Fig. S3** Pore size distribution of prepared carbons.

**Fig. S4** Elemental composition of the mesoporous carbons.

**Fig. S5** FTIR spectra of prepared carbon materials.

**Fig. S6** XPS survey scan spectra of prepared mesoporous carbons.

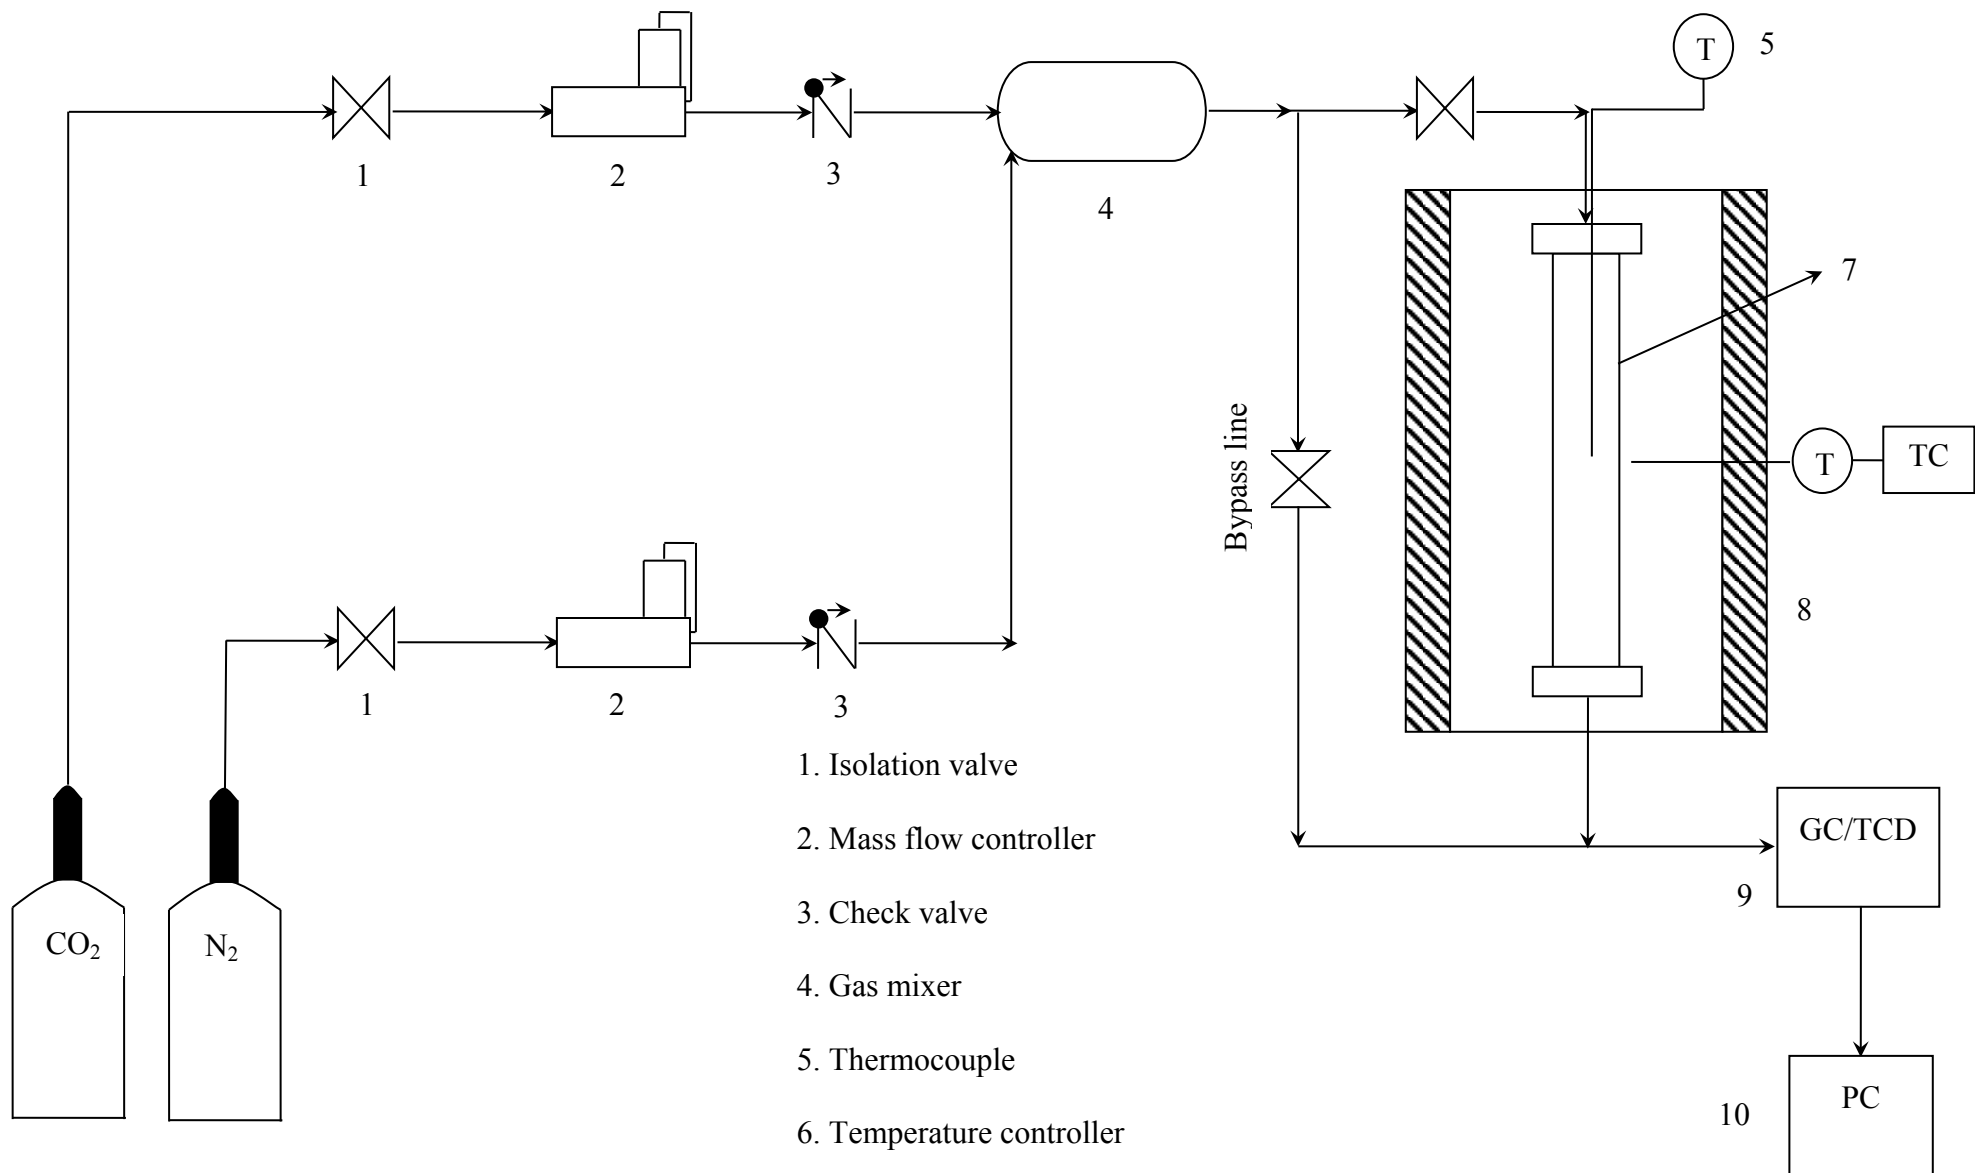

**Fig. S1** Schematic diagram of the adsorption-desorption setup.

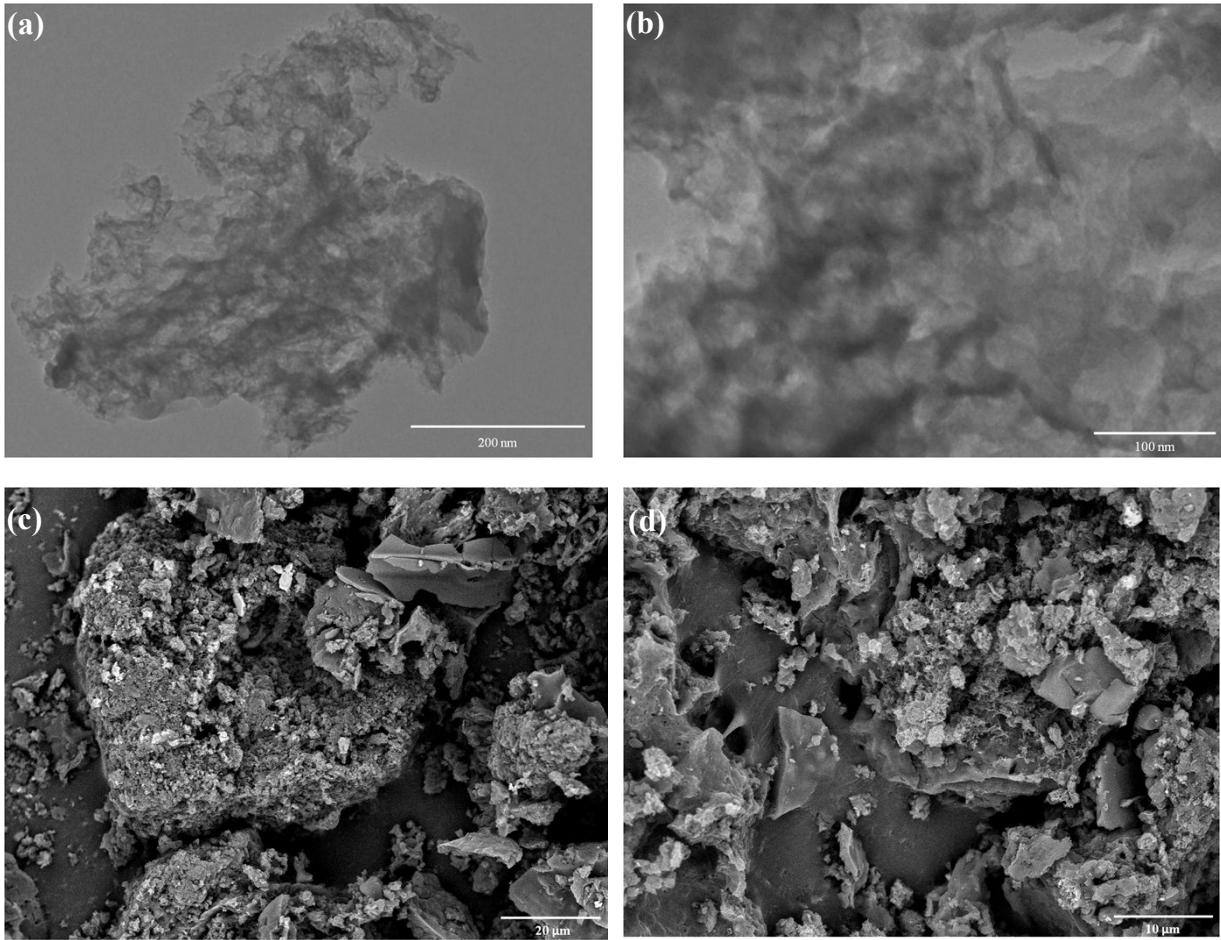

**Fig. S2** TEM images (a) & (b), SEM images (c) & (d) of MF-700.

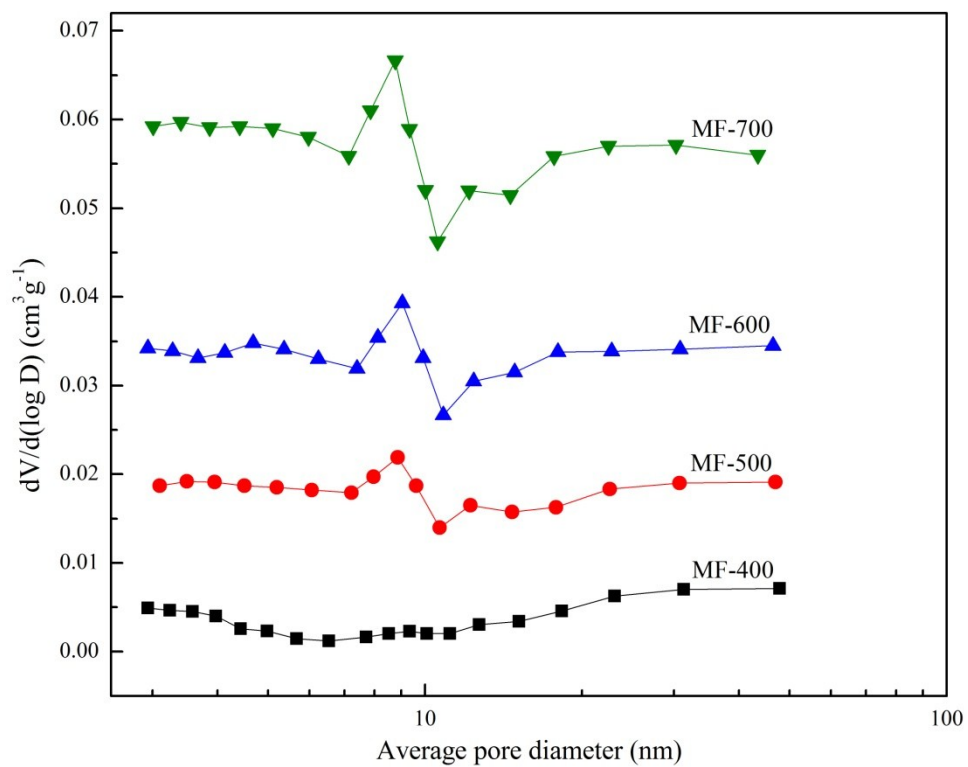

**Fig. S3** Pore size distribution of prepared carbons.

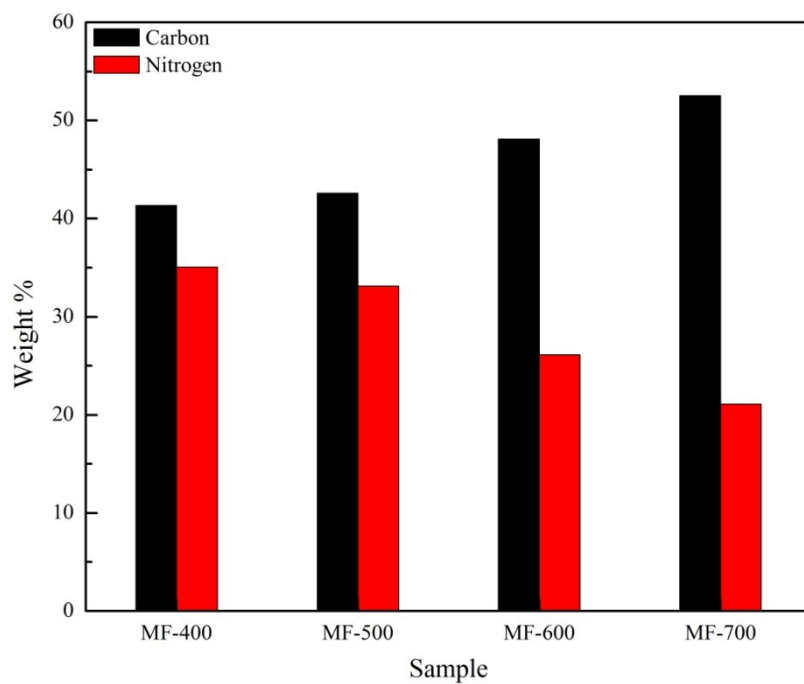

**Fig. S4** Elemental composition of the mesoporous carbons.

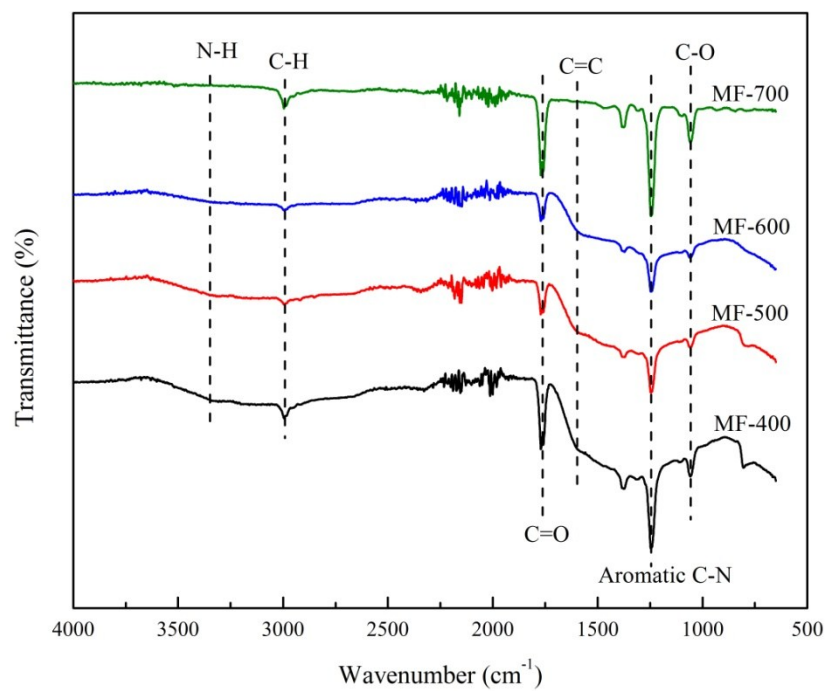

**Fig. S5** FTIR spectra of prepared carbon materials.

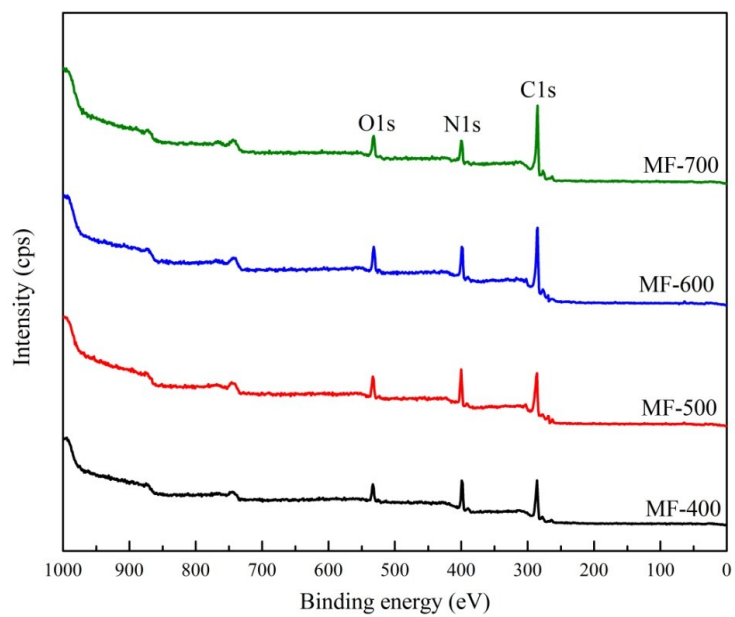

**Fig. S6** XPS survey scan spectra of prepared mesoporous carbons.
